# Supplementary material for: High stability and moderate second-order nonlinear optical properties of hybrid lead-free perovskite [(CH3)3NCH2Cl]CdCl3 bulk crystals
Source: Royal Society of Chemistry journal article supplement (doi:10.1039/d3ce00145h), 2023-01-01
Supplement: d3ce00145h1.pdf [file d3ce00145h1.pdf]

## Electronic Supplementary Information

### High Stability and Moderate Second-Order Nonlinear Optical Properties of Hybrid Lead-Free Perovskite [(CH<sub>3</sub>)<sub>3</sub>NCH<sub>2</sub>Cl]CdCl<sub>3</sub> Bulk Crystals

Chuanying Shen,<sup>a</sup> Jie Liu,<sup>a</sup> Kui Wu,<sup>\*b</sup> Longyun Xu,<sup>c</sup> Defu Sun,<sup>a</sup> Yangyang Dang,<sup>a</sup>  
Jiyang Wang,<sup>b</sup> Duanliang Wang<sup>\*a</sup>

<sup>a</sup>*School of Physics and Engineering, Qufu Normal University, Jining 273165, China*

<sup>b</sup>*State Key Laboratory of Crystal Materials, School of Crystal Materials, Shandong University, Jinan 250100, China*

<sup>c</sup>*School of Materials and Chemical Engineering, Henan University of Urban Construction, Pingdingshan 467000, China*

\*To whom correspondence should be addressed: E-mails: [wqliang012@163.com](mailto:wqliang012@163.com) (D. Wang) and [wukui@sdu.edu.cn](mailto:wukui@sdu.edu.cn) (K. Wu)

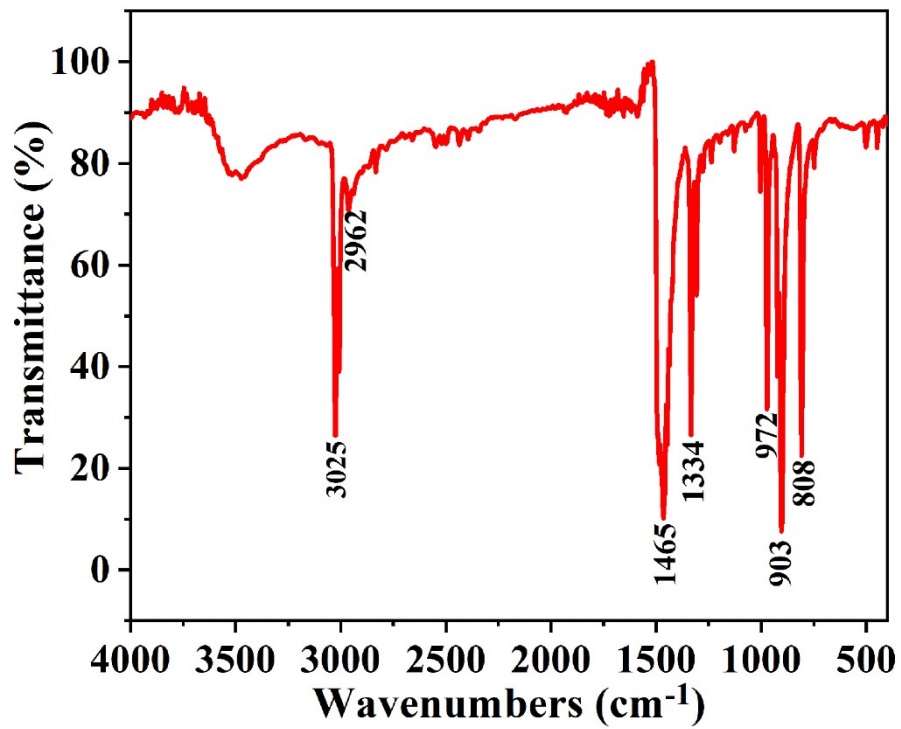

Fig. S1 The IR spectrum of (TMCM)CdCl<sub>3</sub>.

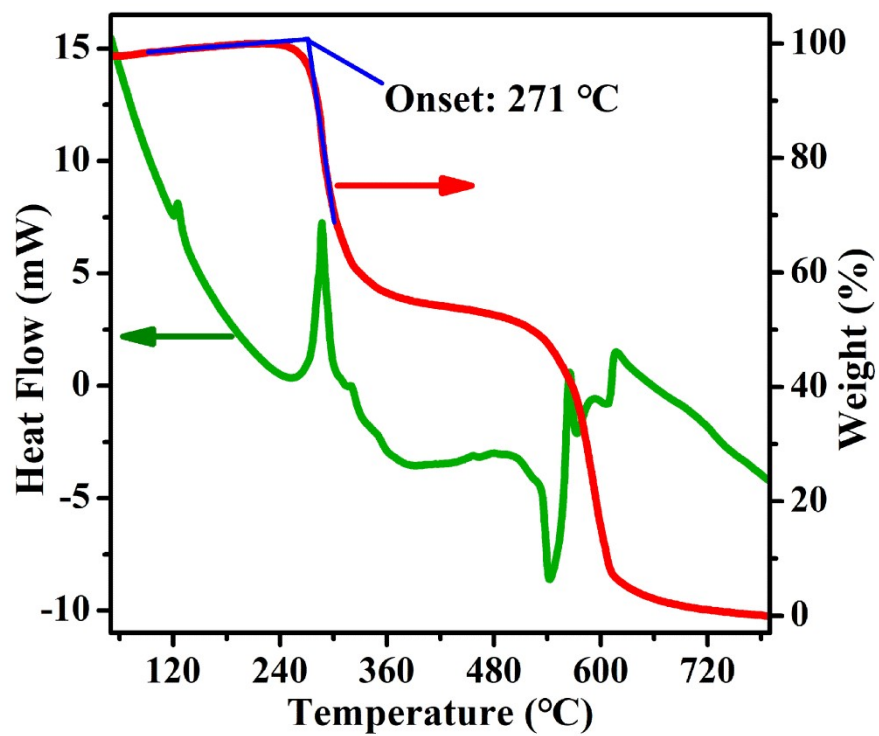

Fig. S2 The thermal stability analysis of DTA and TG curves of (TMCM)CdCl<sub>3</sub>.

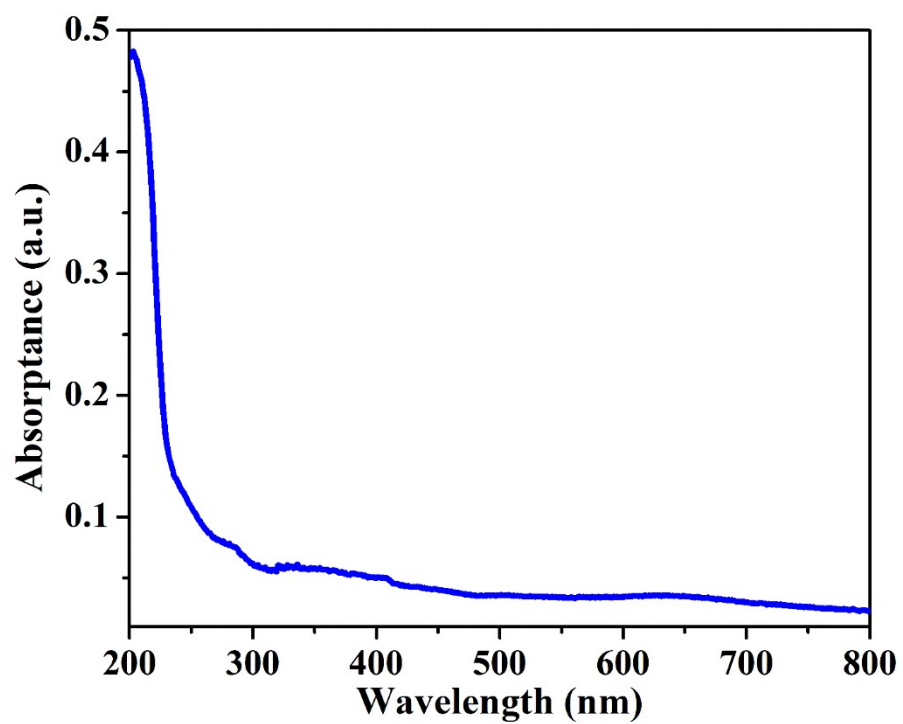

Fig. S3 The absorption spectrum of (TMCM)CdCl<sub>3</sub>.

Table S1. The crystallographic parameters for (TMCM)CdCl<sub>3</sub>.

| Empirical formula                          | C <sub>4</sub> H <sub>11</sub> CdCl <sub>4</sub> N |
|--------------------------------------------|----------------------------------------------------|
| formula weight /g·mol <sup>-1</sup>        | 327.34                                             |
| temperature/K                              | 273.15                                             |
| wavelength/Å                               | 0.71073                                            |
| crystal system                             | Monoclinic                                         |
| space group                                | Cc                                                 |
| a/Å                                        | 9.4797(10)                                         |
| b/Å                                        | 15.7695(16)                                        |
| c/Å                                        | 6.7960(8)                                          |
| α/°                                        | 90                                                 |
| β/°                                        | 94.474(4)                                          |
| γ/°                                        | 90                                                 |
| volume/Å <sup>3</sup>                      | 1012.84(19)                                        |
| Z                                          | 4                                                  |
| density/mg·m <sup>-3</sup>                 | 2.147                                              |
| Absorption coefficient (mm <sup>-1</sup> ) | 3.145                                              |
| F(000)                                     | 632                                                |
| Measured theta range (°)                   | 3.788-28.315                                       |
| Absorption correction                      | Semi-empirical from equivalents                    |
| Data/restraints/parameters                 | 2431/2/95                                          |
| GOF on F <sup>2</sup>                      | 1.069                                              |
| R, wR [I>2σ(I)]                            | 0.0180, 0.0386                                     |
| R, wR [all data]                           | 0.0223, 0.0401                                     |
| Absolute structure parameter               | 0.04(2)                                            |
| Extinction coefficient                     | 0.0094(4)                                          |
| Largest diff. peak and hole                | 0.386 and -0.442 e.Å <sup>-3</sup>                 |

Table S2. Bond lengths [Å] and angles [°] for (TMCM)CdCl<sub>3</sub>.

---

|                       |            |
|-----------------------|------------|
| Cd(1)-Cd(1)#1         | 3.3981(4)  |
| Cd(1)-Cd(1)#2         | 3.3981(4)  |
| Cd(1)-Cl(2)           | 2.6417(14) |
| Cd(1)-Cl(2)#1         | 2.6839(15) |
| Cd(1)-Cl(3)           | 2.6391(12) |
| Cd(1)-Cl(3)#1         | 2.6508(13) |
| Cd(1)-Cl(1)#2         | 2.6451(16) |
| Cd(1)-Cl(1)           | 2.6106(14) |
| Cl(4)-C(1)            | 1.755(5)   |
| N(1)-C(2)             | 1.495(5)   |
| N(1)-C(1)             | 1.491(6)   |
| N(1)-C(4)             | 1.489(5)   |
| N(1)-C(3)             | 1.503(6)   |
| C(2)-H(2A)            | 0.9600     |
| C(2)-H(2B)            | 0.9600     |
| C(2)-H(2C)            | 0.9600     |
| C(1)-H(1A)            | 0.9700     |
| C(1)-H(1B)            | 0.9700     |
| C(4)-H(4A)            | 0.9600     |
| C(4)-H(4B)            | 0.9600     |
| C(4)-H(4C)            | 0.9600     |
| C(3)-H(3A)            | 0.9600     |
| C(3)-H(3B)            | 0.9600     |
| C(3)-H(3C)            | 0.9600     |
|                       |            |
| Cd(1)#1-Cd(1)-Cd(1)#2 | 179.04(2)  |
| Cl(2)-Cd(1)-Cd(1)#2   | 50.90(3)   |
| Cl(2)#1-Cd(1)-Cd(1)#2 | 129.73(3)  |
| Cl(2)#1-Cd(1)-Cd(1)#1 | 49.81(3)   |
| Cl(2)-Cd(1)-Cd(1)#1   | 129.55(3)  |
| Cl(2)-Cd(1)-Cl(2)#1   | 95.10(5)   |
| Cl(2)-Cd(1)-Cl(3)#1   | 98.06(4)   |
| Cl(2)-Cd(1)-Cl(1)#2   | 82.85(4)   |
| Cl(3)-Cd(1)-Cd(1)#1   | 128.86(4)  |
| Cl(3)#1-Cd(1)-Cd(1)#2 | 131.08(3)  |

|                       |           |
|-----------------------|-----------|
| Cl(3)#1-Cd(1)-Cd(1)#1 | 49.88(3)  |
| Cl(3)-Cd(1)-Cd(1)#2   | 50.18(3)  |
| Cl(3)-Cd(1)-Cl(2)#1   | 97.24(4)  |
| Cl(3)-Cd(1)-Cl(2)     | 83.70(5)  |
| Cl(3)#1-Cd(1)-Cl(2)#1 | 82.67(5)  |
| Cl(3)-Cd(1)-Cl(3)#1   | 178.24(7) |
| Cl(3)-Cd(1)-Cl(1)#2   | 83.33(5)  |
| Cl(1)#2-Cd(1)-Cd(1)#2 | 49.27(3)  |
| Cl(1)-Cd(1)-Cd(1)#1   | 50.16(4)  |
| Cl(1)#2-Cd(1)-Cd(1)#1 | 131.23(3) |
| Cl(1)-Cd(1)-Cd(1)#2   | 129.33(4) |
| Cl(1)-Cd(1)-Cl(2)     | 176.95(6) |
| Cl(1)#2-Cd(1)-Cl(2)#1 | 177.80(6) |
| Cl(1)-Cd(1)-Cl(2)#1   | 82.69(4)  |
| Cl(1)-Cd(1)-Cl(3)#1   | 83.77(5)  |
| Cl(1)-Cd(1)-Cl(3)     | 94.47(4)  |
| Cl(1)#2-Cd(1)-Cl(3)#1 | 96.83(5)  |
| Cl(1)-Cd(1)-Cl(1)#2   | 99.39(6)  |
| Cd(1)-Cl(2)-Cd(1)#2   | 79.29(4)  |
| Cd(1)-Cl(3)-Cd(1)#2   | 79.94(2)  |
| Cd(1)-Cl(1)-Cd(1)#1   | 80.56(4)  |
| C(2)-N(1)-C(3)        | 109.1(3)  |
| C(1)-N(1)-C(2)        | 110.8(3)  |
| C(1)-N(1)-C(3)        | 105.8(4)  |
| C(4)-N(1)-C(2)        | 108.7(4)  |
| C(4)-N(1)-C(1)        | 113.2(3)  |
| C(4)-N(1)-C(3)        | 109.2(4)  |
| N(1)-C(2)-H(2A)       | 109.5     |
| N(1)-C(2)-H(2B)       | 109.5     |
| N(1)-C(2)-H(2C)       | 109.5     |
| H(2A)-C(2)-H(2B)      | 109.5     |
| H(2A)-C(2)-H(2C)      | 109.5     |
| H(2B)-C(2)-H(2C)      | 109.5     |
| Cl(4)-C(1)-H(1A)      | 109.3     |
| Cl(4)-C(1)-H(1B)      | 109.3     |
| N(1)-C(1)-Cl(4)       | 111.4(3)  |
| N(1)-C(1)-H(1A)       | 109.3     |
| N(1)-C(1)-H(1B)       | 109.3     |

|                  |       |
|------------------|-------|
| H(1A)-C(1)-H(1B) | 108.0 |
| N(1)-C(4)-H(4A)  | 109.5 |
| N(1)-C(4)-H(4B)  | 109.5 |
| N(1)-C(4)-H(4C)  | 109.5 |
| H(4A)-C(4)-H(4B) | 109.5 |
| H(4A)-C(4)-H(4C) | 109.5 |
| H(4B)-C(4)-H(4C) | 109.5 |
| N(1)-C(3)-H(3A)  | 109.5 |
| N(1)-C(3)-H(3B)  | 109.5 |
| N(1)-C(3)-H(3C)  | 109.5 |
| H(3A)-C(3)-H(3B) | 109.5 |
| H(3A)-C(3)-H(3C) | 109.5 |
| H(3B)-C(3)-H(3C) | 109.5 |

---

Symmetry transformations used to generate equivalent atoms:

#1  $x, -y+1, z+1/2$     #2  $x, -y+1, z-1/2$
